# Supplementary material for: Atomic imaging of the motion and transformation of Pt3Ni nanoparticles in liquids
Source: Royal Society of Chemistry journal article supplement (doi:10.1039/d1ce00216c), 2021-01-01
Supplement: d1ce00216c6.pdf [file d1ce00216c6.pdf]

# Atomic Imaging the Motion and Transformation of $\text{Pt}_3\text{Ni}$ Nanoparticles in liquids

*Junyu Zhang<sup>\*a</sup>, Peng Zhao<sup>\*a,b</sup>*

*a. Instrumental Analysis Center, Laboratory and Equipment*

*Management Department, Huaqiao University, Xiamen 361021, China*

*b. College of Chemical Engineering, Huaqiao University, Xiamen 361021,*

*China*

E-mail: [zjy2020@hqu.edu.cn](mailto:zjy2020@hqu.edu.cn), [zhaopeng@hqu.edu.cn](mailto:zhaopeng@hqu.edu.cn)

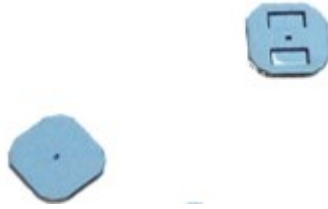

**Fig. S1** The photograph of SiNx liquid cells.

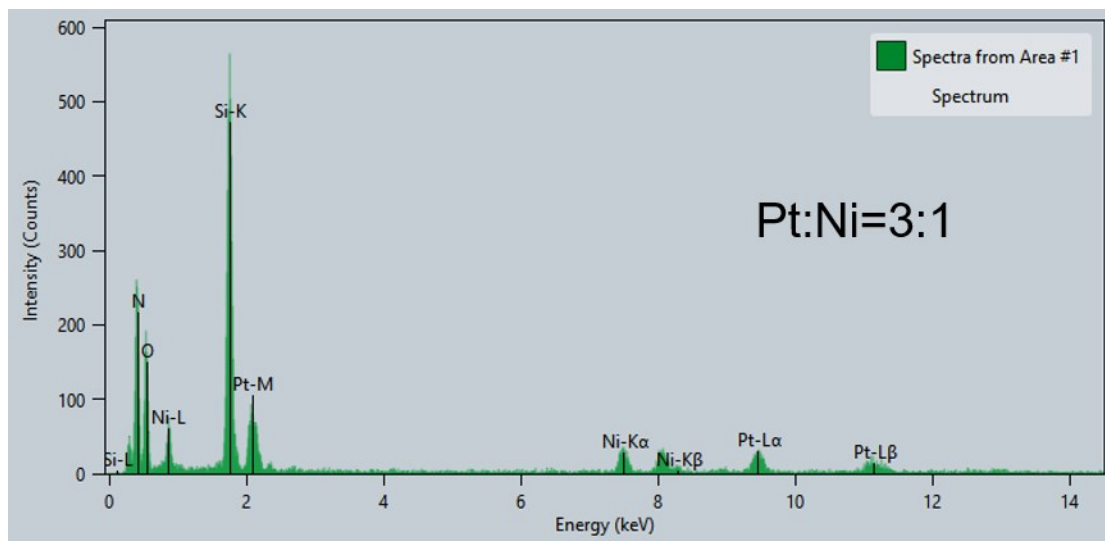

**Fig. S2** The EDS spectra of for the nanoparticles in SiNx liquid cell by ex-TEM

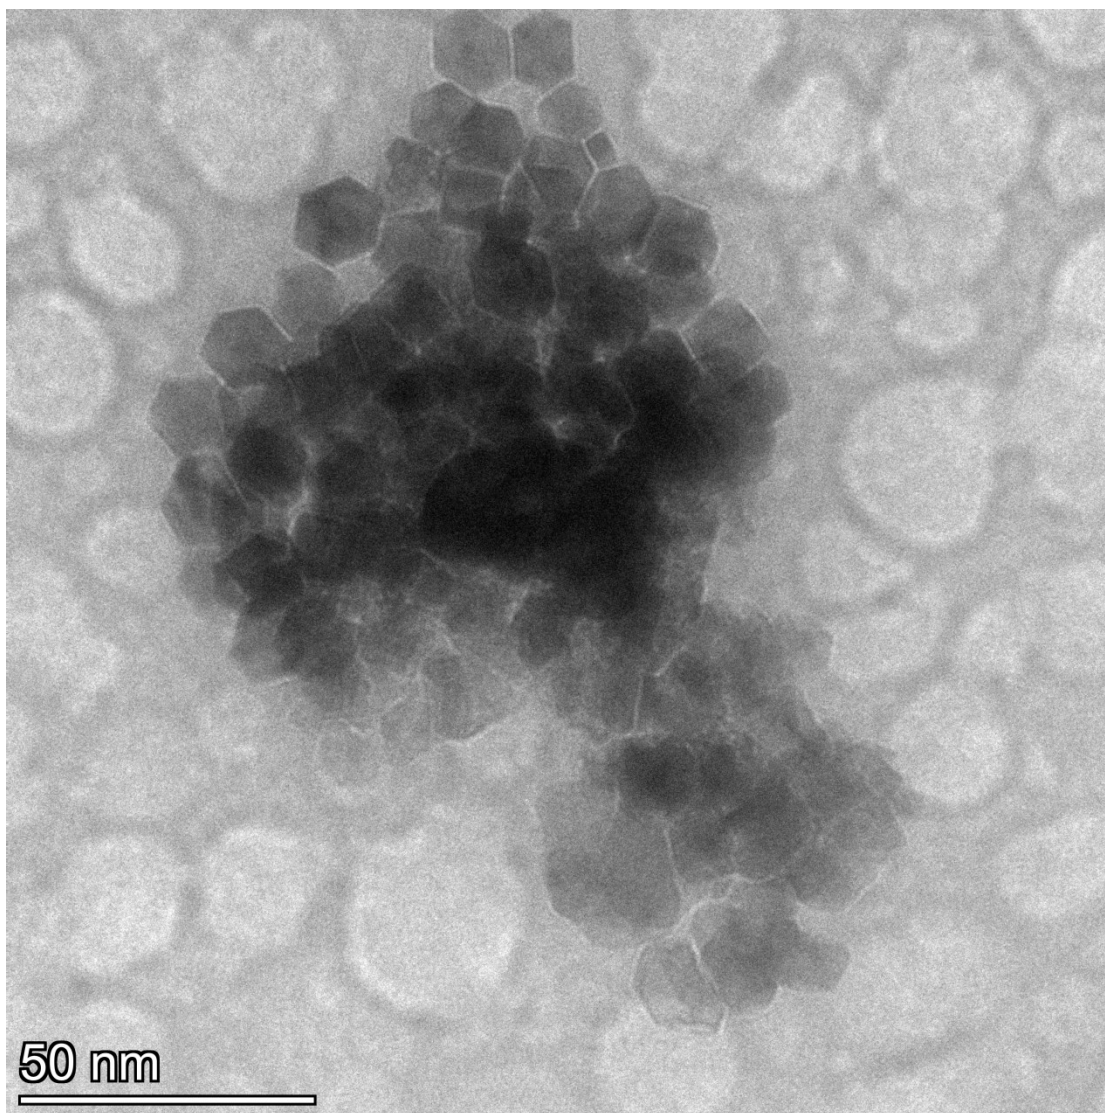

**Fig. S3** The low-resolution TEM images showing the Pt<sub>3</sub>Ni nanoparticles in the DMF solution.

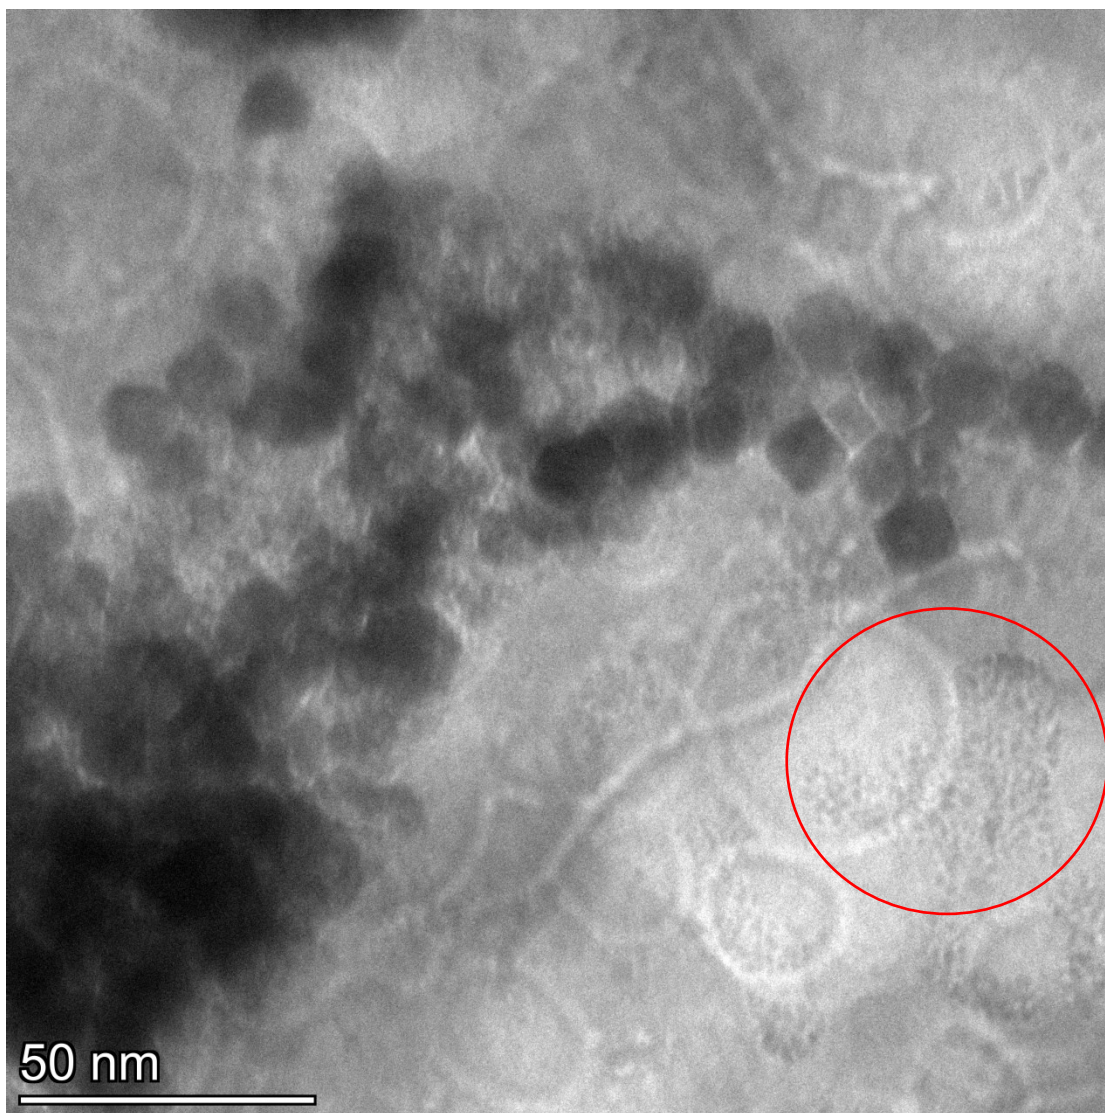

**Fig. S4** The low-resolution TEM images showing the small nanoparticles in the DMF solution.

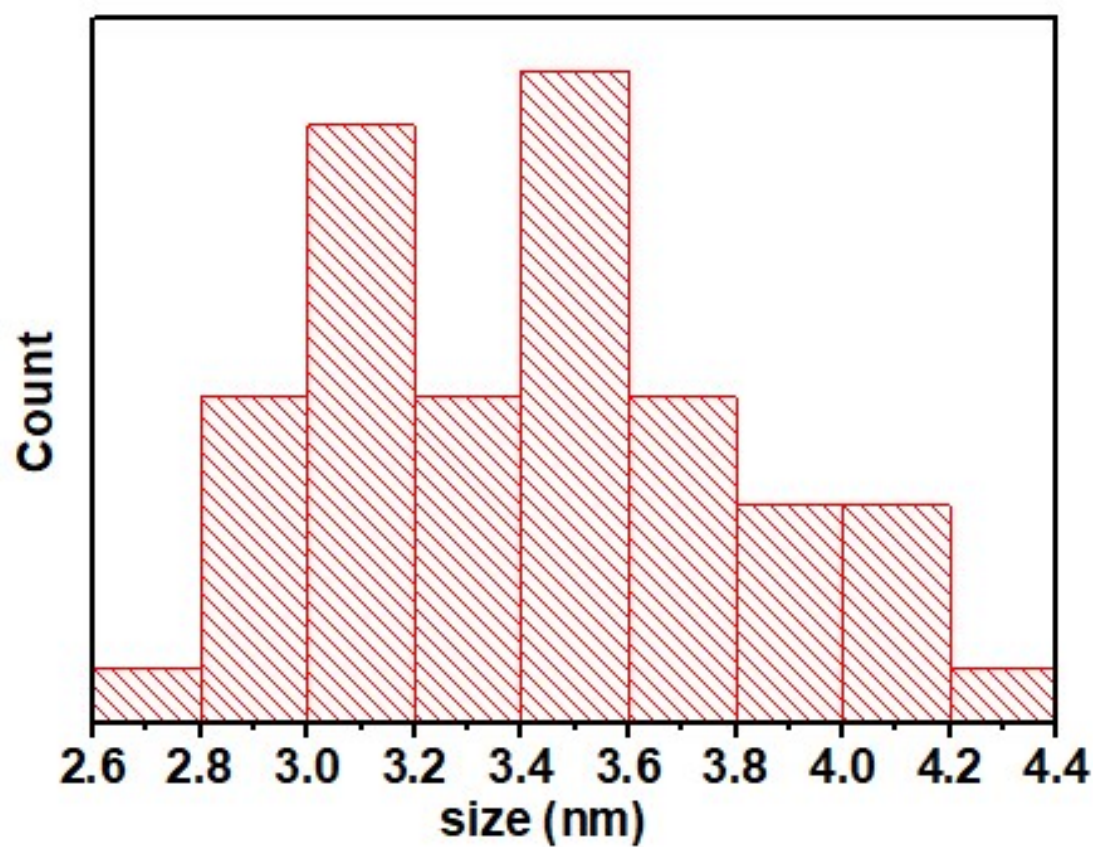

Fig. S5 the size of small nanoparticles

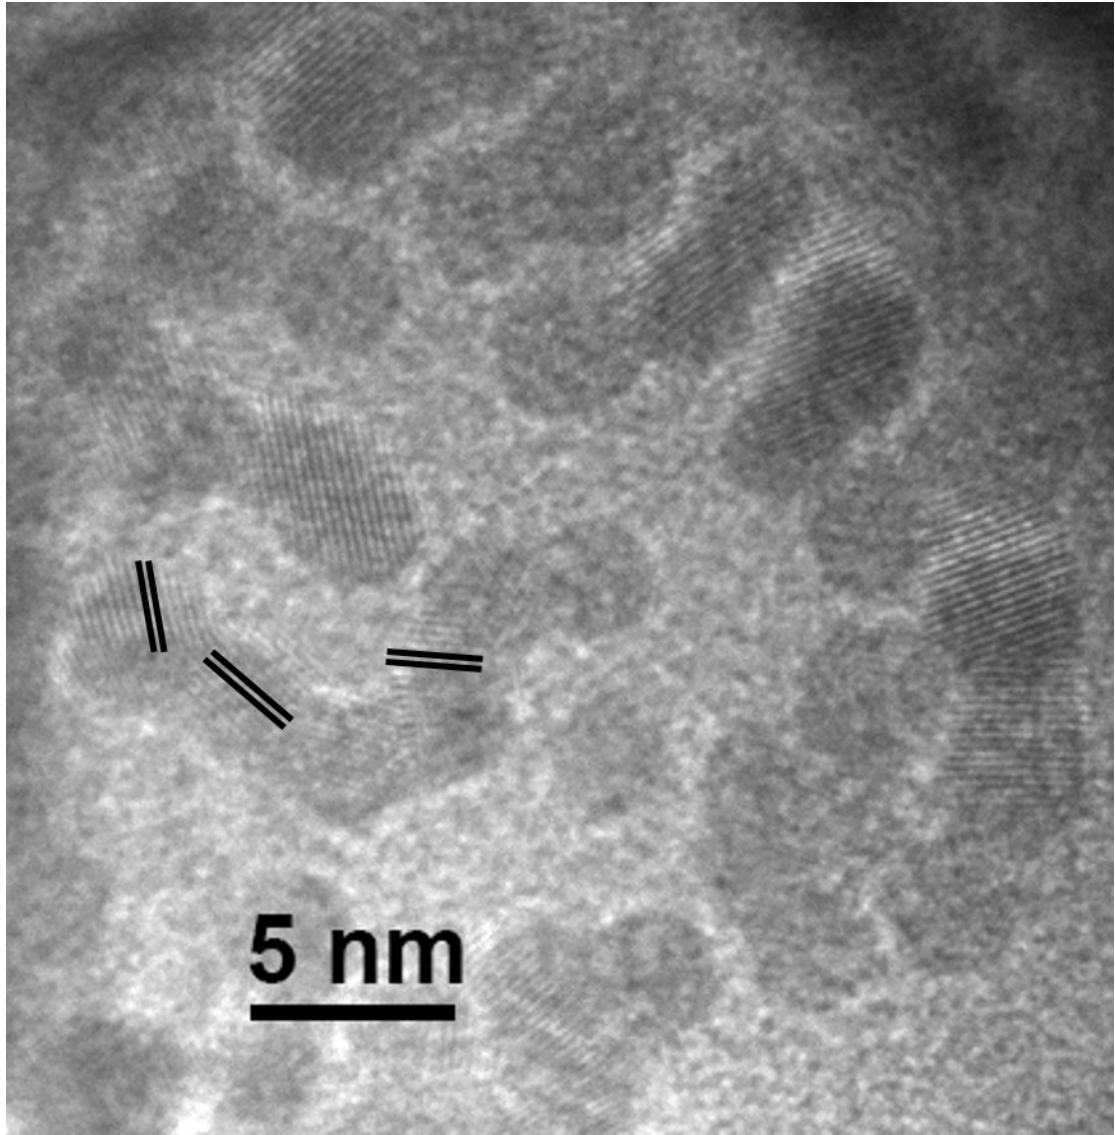

**Fig. S6** The HR TEM images of Pt<sub>3</sub>Ni nanowires

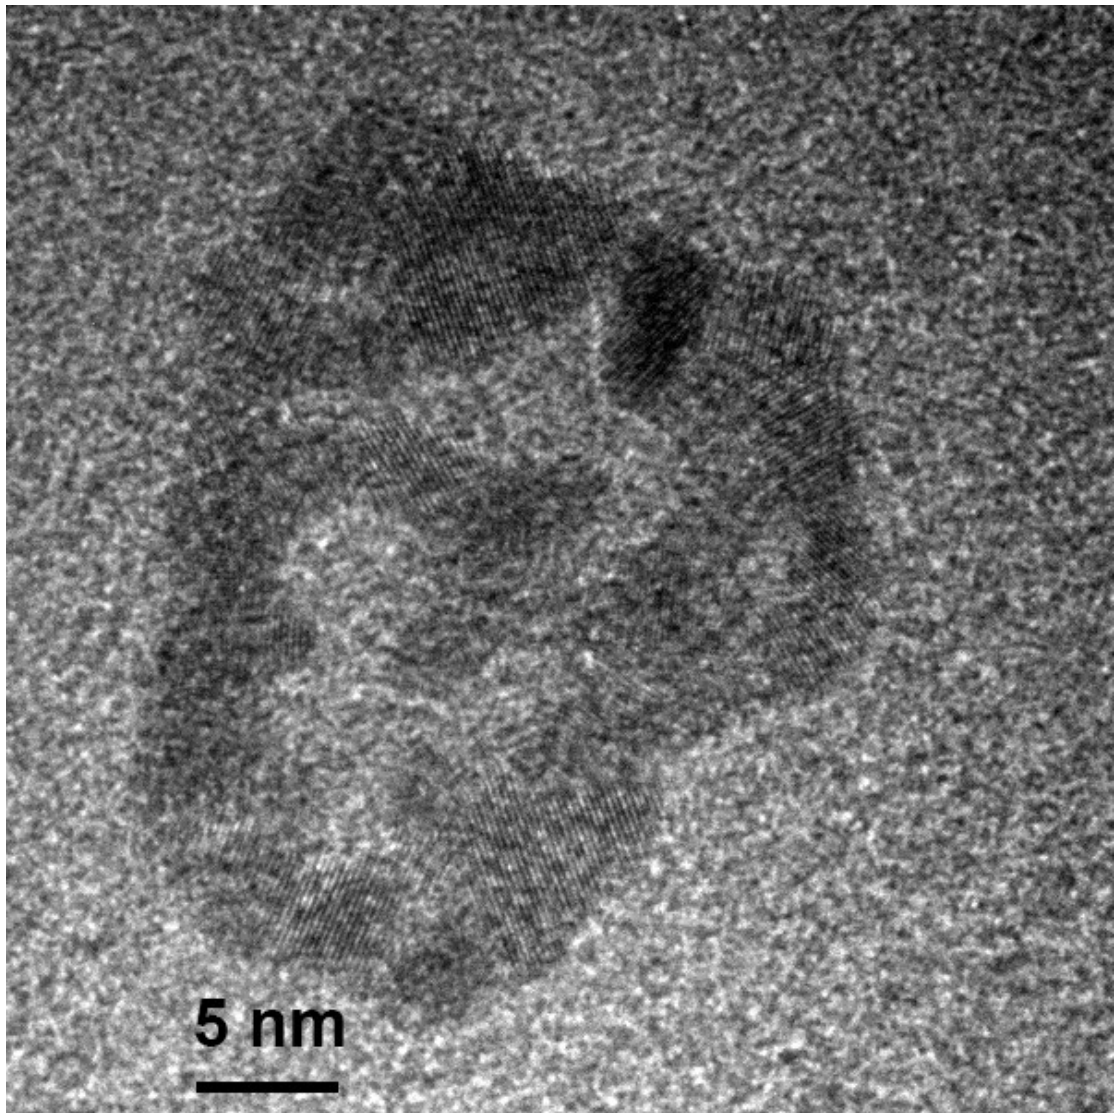

Fig. S7 The HR TEM images of Pt<sub>3</sub>Ni rings

## 1. Movie Captions

**Movie S1, S2 and S3:** Atomic motion trajectories of single particle in liquid cell. The movie plays fifty times faster than real time. The dose rate during the data collection is about  $3320 \text{ e}/\text{\AA}^2\cdot\text{s}$ .

**Movie S4:** Atomic-scale reaction dynamics of a  $\text{Pt}_3\text{Ni}$  nanoparticle in liquid cell. The movie plays three times faster than real time. The dose rate during the data collection is about  $5000 \text{ e}/\text{\AA}^2\cdot\text{s}$ .

**Movie S5:** Formation of  $\text{Pt}_3\text{Ni}$  nanowires. The movie plays six times faster than real time. The dose rate during the data collection is about  $6873 \text{ e}/\text{\AA}^2\cdot\text{s}$ .
